# Supplementary material for: CRISPR–Cas9-mediated chromosome engineering in Arabidopsis thaliana
Source: Springer Nature journal article supplement (doi:10.1038/s41596-022-00686-7), 2022-04-06
Supplement: MOESM1 [file 41596_2022_686_MOESM1_ESM14.xlsx]

## Sheet: Sheet
Well	Sample	Target	Conc(copies/µL)	Status	Experiment	SampleType	TargetType	Supermix	DyeName(s)	Copies/20µLWell	TotalConfMax	TotalConfMin	PoissonConfMax	PoissonConfMin	Accepted Droplets	Positives	Negatives	Ch1+Ch2+	Ch1+Ch2-	Ch1-Ch2+	Ch1-Ch2-	Linkage	CNV	TotalCNVMax	TotalCNVMin	PoissonCNVMax	PoissonCNVMin	ReferenceCopies	UnknownCopies	Threshold1	Threshold2	Threshold3	ReferenceUsed	Ratio	TotalRatioMax	TotalRatioMin	PoissonRatioMax	PoissonRatioMin	Fractional Abundance	TotalFractionalAbundanceMax	TotalFractionalAbundanceMin	PoissonFractionalAbundanceMax	PoissonFractionalAbundanceMin	MeanAmplitudeOfPositives	MeanAmplitudeOfNegatives	MeanAmplitudeTotal	ExperimentComments	MergedWells	TotalConfidenceMax68
A07	N2	FAM	No Call	CHECK	DQ	Unknown	Unknown	ddPCR Supermix for Probes (no dUTP)	FAM						16353	0	16353	0	0	9634	6719	0																						0	106.466	106.466
A07	N2	Normalisierung	1046.44	Manual	DQ	Unknown	Unknown	ddPCR Supermix for Probes (no dUTP)	HEX	20928.8			1068.23	1025.04	16353	9634	6719	0	0	9634	6719	0								2330														3144.78	1813.92	2597.97
B07	N2	FAM	No Call	CHECK	DQ	Unknown	Unknown	ddPCR Supermix for Probes (no dUTP)	FAM						18199	0	18199	0	0	15000	3199	0																						0	142.286	142.286
B07	N2	Normalisierung	2045.33	Manual	DQ	Unknown	Unknown	ddPCR Supermix for Probes (no dUTP)	HEX	40906.6			2082.94	2008.89	18199	15000	3199	0	0	15000	3199	0								2330														3503.11	1750.14	3194.98
C07	N2	FAM	No Call	CHECK	DQ	Unknown	Unknown	ddPCR Supermix for Probes (no dUTP)	FAM						17601	0	17601	0	0	15631	1970	0																						0	174.425	174.425
C07	N2	Normalisierung	2576.38	Manual	DQ	Unknown	Unknown	ddPCR Supermix for Probes (no dUTP)	HEX	51527.6			2626.39	2528.41	17601	15631	1970	0	0	15631	1970	0								2330														3993.38	1723.46	3739.32
D07	N2	FAM	No Call	CHECK	DQ	Unknown	Unknown	ddPCR Supermix for Probes (no dUTP)	FAM						16927	0	16927	0	0	15850	1077	0																						0	185.737	185.737
D07	N2	Normalisierung	3240.86	Manual	DQ	Unknown	Unknown	ddPCR Supermix for Probes (no dUTP)	HEX	64817.2			3310.89	3174.76	16927	15850	1077	0	0	15850	1077	0								2330														4178.14	1677.1	4019.01
E07	N2	FAM	No Call	CHECK	DQ	Unknown	Unknown	ddPCR Supermix for Probes (no dUTP)	FAM						16183	0	16183	0	0	14844	1339	0																						0	186.695	186.695
E07	N2	Normalisierung	2931.81	Manual	DQ	Unknown	Unknown	ddPCR Supermix for Probes (no dUTP)	HEX	58636.2			2993.76	2872.95	16183	14844	1339	0	0	14844	1339	0								2330														4352.96	1702.63	4133.67
F07	N2	FAM	No Call	CHECK	DQ	Unknown	Unknown	ddPCR Supermix for Probes (no dUTP)	FAM						14782	0	14782	0	0	13712	1070	0																						0	188.158	188.158
F07	N2	Normalisierung	3089.12	Manual	DQ	Unknown	Unknown	ddPCR Supermix for Probes (no dUTP)	HEX	61782.4			3159.05	3023.11	14782	13712	1070	0	0	13712	1070	0								2330														4296.63	1716.36	4109.85
G07	N2	FAM	No Call	CHECK	DQ	Unknown	Unknown	ddPCR Supermix for Probes (no dUTP)	FAM						15474	0	15474	0	0	14113	1361	0																						0	180.478	180.478
G07	N2	Normalisierung	2859.93	Manual	DQ	Unknown	Unknown	ddPCR Supermix for Probes (no dUTP)	HEX	57198.6			2921.19	2801.7	15474	14113	1361	0	0	14113	1361	0								2330														4180.02	1723.7	3963.97
H07	N2	FAM	No Call	CHECK	DQ	Unknown	Unknown	ddPCR Supermix for Probes (no dUTP)	FAM						14812	0	14812	0	0	13509	1303	0																						0	179.157	179.157
H07	N2	Normalisierung	2859.73	Manual	DQ	Unknown	Unknown	ddPCR Supermix for Probes (no dUTP)	HEX	57194.5			2922.37	2800.25	14812	13509	1303	0	0	13509	1303	0								2330														4049.54	1708.78	3843.63
[truncated: 15 more columns]
